# Supplementary material
Source: publisher site journal article supplement (http://static.cambridge.org/content/id/urn:cambridge.org:id:article:S1368980019001307/resource/name/S1368980019001307supp002.docx)

**Online Figure 2:** Baseline enrollment and participants included in the HT incidence analysis of the PERU MIGRANT study


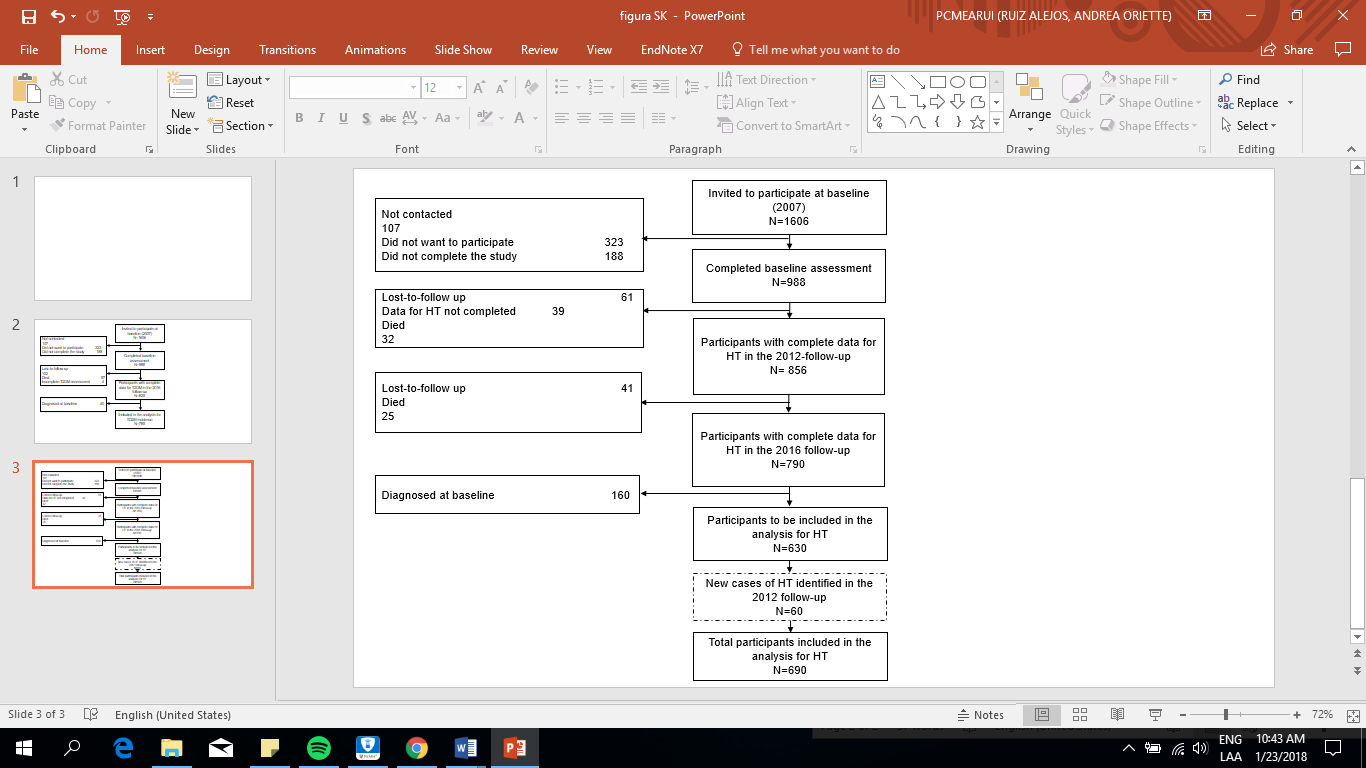

Supplement: Supplementary file 1 [file S1368980019001307supp002.docx]
